# Supplementary material for: Maternal Vaginal Ureaplasma spp. Colonization in Early Pregnancy Is Associated with Adverse Short- and Long-Term Outcome of Very Preterm Infants
Source: MDPI journal article supplement (doi:10.3390/children8040276), 2021-04-03
Supplement: s1 [file s1]

**Table 1.** Short-term clinical outcome of study patients with follow up data at 24 months corrected age according to vaginal *Ureaplasma* spp. colonization.

|                              | <b>Whole Group<br/><i>n</i> = 92</b> | <b><i>Ureaplasma</i> spp.<br/>Negative<br/><i>n</i> = 55</b> | <b><i>Ureaplasma</i> spp. Positive<br/><i>n</i> = 37</b> | <b><i>p</i>-Value</b> |
|------------------------------|--------------------------------------|--------------------------------------------------------------|----------------------------------------------------------|-----------------------|
| EOS, <i>n</i> (%)            | 1(1.1)                               | 1 (1.8)                                                      | 0 (0.0)                                                  | 0.99                  |
| Any IVH, <i>n</i> (%)        | 19 (20.7)                            | 7 (12.7)                                                     | 12 (32.4)                                                | 0.03                  |
| Severe IVH, <i>n</i> (%)     | 6 (6.5)                              | 1                                                            | 5                                                        | 0.04                  |
| PVL, <i>n</i> (%)            | 2 (2.2)                              | 1 (1.8)                                                      | 1 (2.7)                                                  | 0.99                  |
| NEC, <i>n</i> (%)            | 7 (7.6)                              | 3                                                            | 4                                                        | 0.43                  |
| Any ROP, <i>n</i> (%)        | 26 (28.3)                            | 9                                                            | 17                                                       | <0.005                |
| Severe ROP, <i>n</i> (%)     | 6 (6.5)                              | 2                                                            | 4                                                        | 0.22                  |
| BPD 28 days #, <i>n</i> (%)  | 37 (40.2)                            | 16                                                           | 21                                                       | 0.01                  |
| BPD 36 weeks #, <i>n</i> (%) | 12 (13.1)                            | 8                                                            | 4                                                        | 0.76                  |

# only patients surviving 28 days of life and 36 weeks of adjusted age, respectively, are included.
